# Supplementary material for: Clearance of HBeAg and HBsAg of HBV in mice model by a recombinant HBV vaccine combined with GM-CSF and IFN-α as an effective therapeutic vaccine adjuvant
Source: PubMed Central journal article supplement (PMC6188151; doi:10.18632/oncotarget.25789), 2018-07-13
Supplement: oncotarget-09-34213-s001.pdf [file oncotarget-09-34213-s001.pdf]

## Clearance of HBeAg and HBsAg of HBV in mice model by a recombinant HBV vaccine combined with GM-CSF and IFN- $\alpha$ as an effective therapeutic vaccine adjuvant

### SUPPLEMENTARY MATERIALS

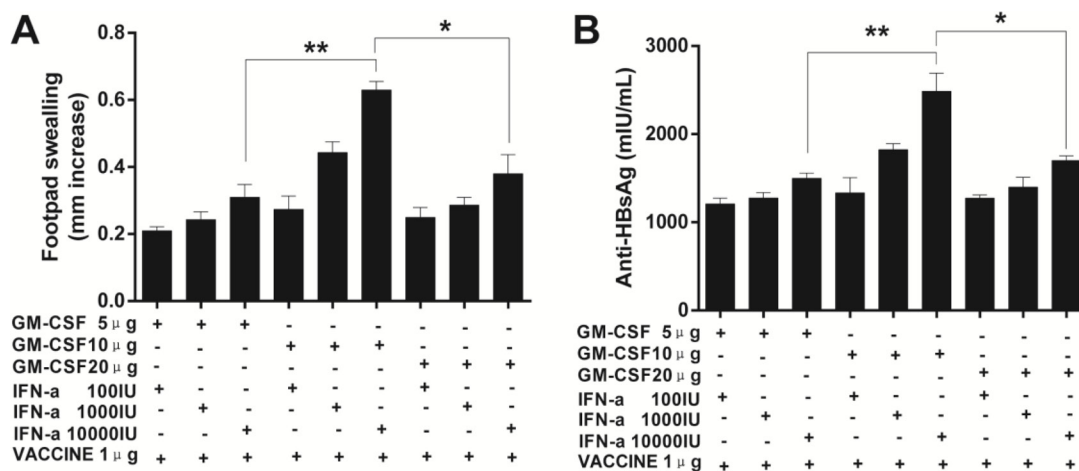

**Supplementary Figure 1: GM-CSF combined with IFN- $\alpha$  enhanced immune response of HBV vaccine (VACCINE).** The wild type C57BL/6 mice were immunized three times with VACCINE (1  $\mu$ g) combined with different dose formulation of GM-CSF and IFN- $\alpha$  in a 2-week interval. **(A)** 7 days after the third immunization, DTH were tested at 24 hours after HBsAg challenge at footpads of immunized mice. **(B)** 7 days after the third immunization, serum of immunized mice were collected for anti-HBsAg test by ELISA. Bars represent mean  $\pm$  SEM from 3 independent experiments, \* $P$  < 0.05; \*\* $P$  < 0.01; ns, not significant.

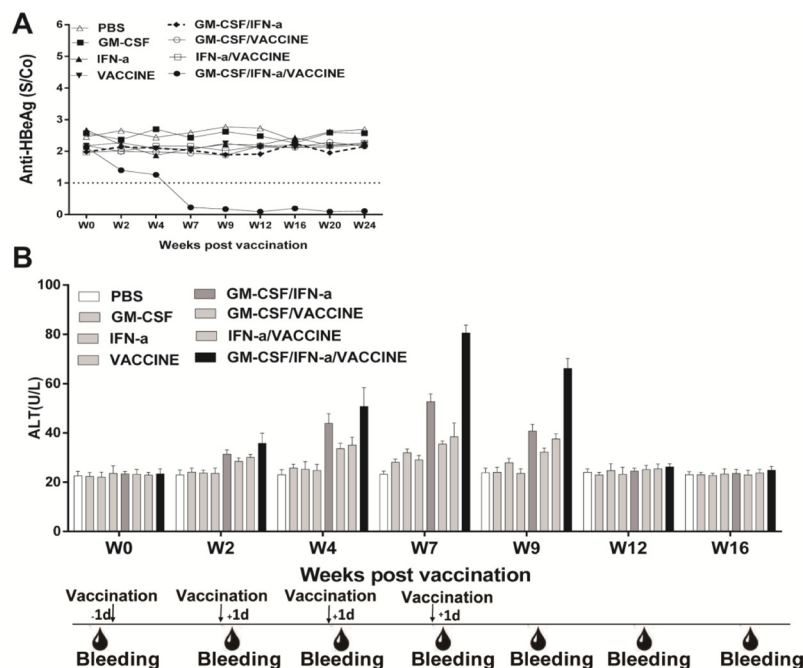

**Supplementary Figure 2: Responses of AAV/HBV infected mice to the GM-CSF/IFN- $\alpha$ /VACCINE regimen.** **(A)** At intervals up to 24 weeks, serum anti-HBeAg was determined by ELISA. Dotted lines represent the threshold of detection. >1 means anti-HBeAg-negative, and <1 means anti-HBeAg-positive. **(B)** One day before the first vaccination, the blood samples were collected from the AAV/HBV infected mice. Serum ALT was determined as a background level. Then the model mice were bled one day after the rest of three immunizations. After the end of vaccination, the mice were bled at 2-week, 3-week and 4-week follow up.

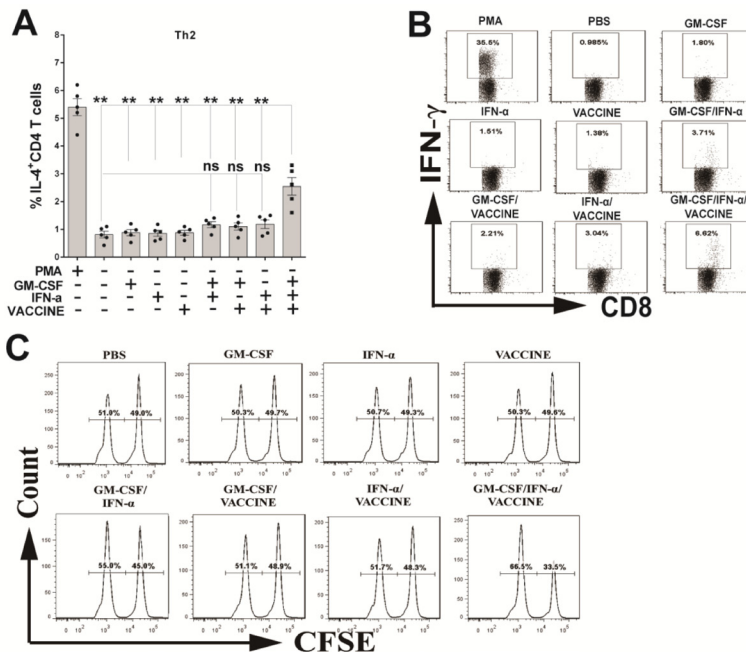

**Supplementary Figure 3: GM-CSF/IFN- $\alpha$ /VACCINE elicit cellular immunity against AAV/HBV infection.** (A) 14 days after the fourth immunization, the spleen cells were stimulated with 10  $\mu$ g/mL HBsAg for 18 hours *in vitro*. Cells were incubated for 6 hours with PMA/Ionomycin (100 ng/mL / 1 $\mu$ g/mL) as a positive control. Th2 was detected by intracellular cytokine. The percentage of IFN- $\gamma$ <sup>+</sup>CD4<sup>+</sup> T cells is presented. (B) Representative flow cytometric profiles of IFN- $\gamma$ <sup>+</sup>CD8<sup>+</sup> T cells. (C) Representative flow cytometric histograms of HBsAg-specific CTL activity *in vivo* in AAV/HBV infected mice.

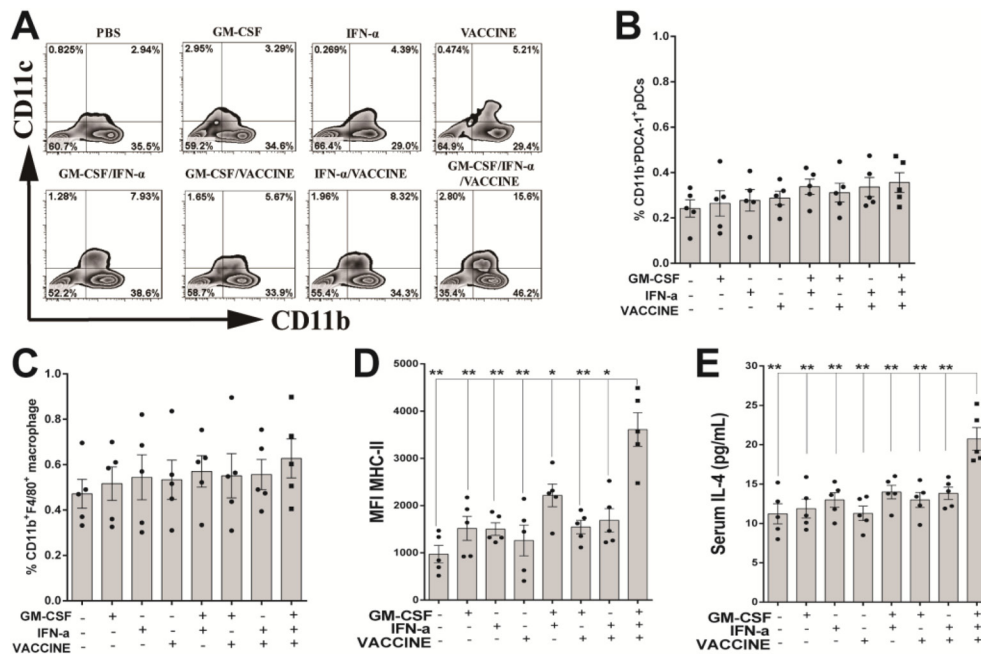

**Supplementary Figure 4: GM-CSF/IFN- $\alpha$ /VACCINE promoted both the production and the function of CD11b<sup>+</sup>CD11c<sup>+</sup> DC.** (A) Representative flow cytometric profiles of CD11b<sup>+</sup>CD11c<sup>+</sup> DC in blood. (B–C) Percentage of CD11b<sup>+</sup>F4/80<sup>+</sup> macrophage and CD11b<sup>+</sup>PDCA-1<sup>+</sup> plasmacytoid dendritic cells in blood of AAV/HBV infected mice inoculated with different formulations of the vaccine. (D) Comparison of MHC-II on of CD11b<sup>+</sup>CD11c<sup>+</sup> DC in blood. (E) Serum concentration of IL-4 of AAV/HBV infected mice.

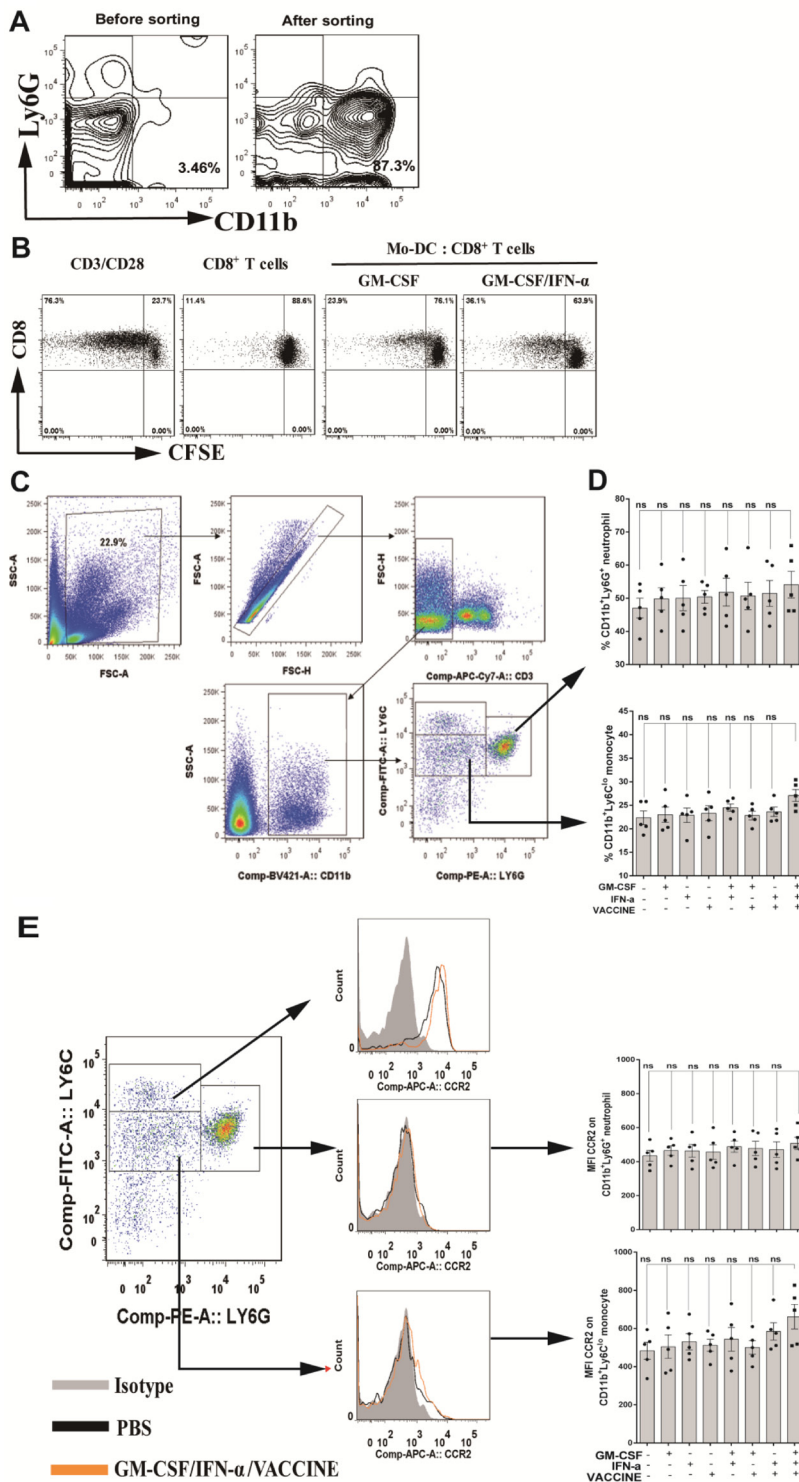

**Supplementary Figure 5: GM-CSF plus IFN- $\alpha$  promoted both the production and the function of CD11c<sup>+</sup> monocyte derived DC (MoDC) *in vitro* and *in vivo*.** (A) CD11b<sup>+</sup>Ly6G<sup>-</sup> monocytes were sorted from PBMC of male wild-type C57BL/6 ( $n = 50$ ). (B) Conventional CD8<sup>+</sup> T cells were sorted from spleen cells of AAV8-1.3HBV mice and co-cultured with HBsAg (10  $\mu$ g/mL)-pulsed MoDC which generated from GM-CSF or GM-CSF/IFN- $\alpha$  at ratio 10:1 for 72 hours. CD3/CD28 (1  $\mu$ g/mL / 100 ng/mL) was used as a positive control. (C) Flow cytometry gating of inflammatory monocytes (CD3<sup>-</sup>CD11b<sup>+</sup>Ly6G<sup>hi</sup>), circulating monocytes (CD3<sup>-</sup>CD11b<sup>+</sup>Ly6G<sup>lo</sup>), and granulocytes (CD3<sup>-</sup>CD11b<sup>+</sup>Ly6G<sup>hi</sup>) in blood of AAV8-1.3HBV-infected mice. (D) Percentage of blood Ly6G<sup>-</sup>Ly6C<sup>lo</sup> monocytes, and Ly6G<sup>+</sup>Ly6C<sup>+</sup> granulocytes of AAV8-1.3HBV-infected mice treated different formulation vaccine for 3 days. Numbers adjacent to outlined area indicate percent Ly6G<sup>-</sup>Ly6C<sup>hi</sup> monocytes (top left), Ly6G<sup>-</sup>Ly6C<sup>lo</sup> monocytes (bottom left), and Ly6G<sup>+</sup>Ly6C<sup>+</sup> granulocytes (right). Bars are shown as mean  $\pm$  SEM. ns, not significant. (E) Comparison of MFI CCR2 on Ly6G<sup>-</sup>Ly6C<sup>lo</sup> monocytes, and Ly6G<sup>+</sup>Ly6C<sup>+</sup> granulocytes. Data are pooled from two independent experiments with 5 mice per group. Bars are shown as mean  $\pm$  SEM. ns, not significant.
